# Supplementary material for: Electrospun Cu–Co ferrite nanofibers: synthesis, structure, optical and magnetic properties, and anti-cancer activity
Source: Royal Society of Chemistry journal article supplement (doi:10.1039/d3ra08087k), 2024-01-01
Supplement: d3ra08087k1.pdf [file d3ra08087k1.pdf]

**Supporting Information File of “Electrospun Cu-Co ferrite nanofibers synthesis, structure, optical and magnetic properties, and anti-cancer activity”**

Fatimah Alahmari\*, Firdos Alam Khan, H. Sozeri, M. Sertkol, Mariusz Jaremkó

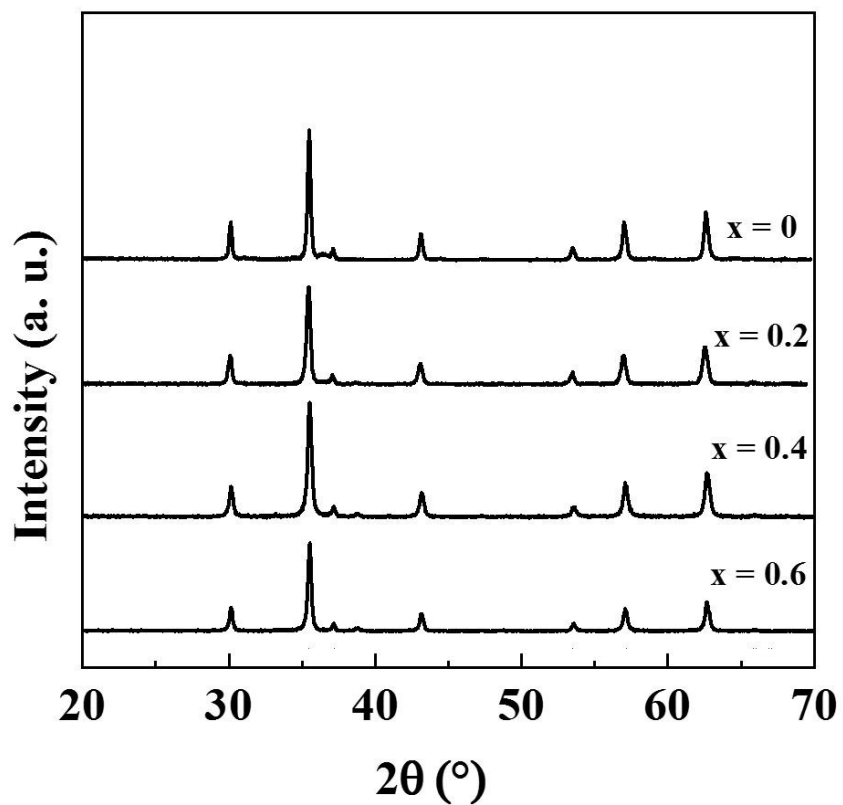

**Figure 1S.** As-measured PXRD patterns of Cu<sub>x</sub>Co<sub>1-x</sub>Fe<sub>2</sub>O<sub>4</sub> (0 ≤ x ≤ 0.6) NFs.

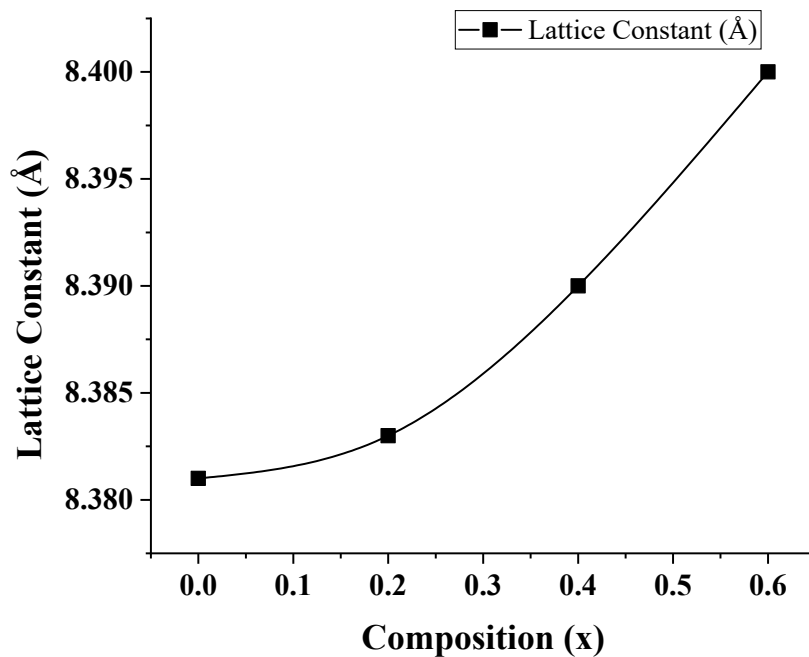

**Figure 2S.** A plot for the relation between the lattice constant  $a$  and  $\text{Cu}^{2+}$  concentration in the sample represented by  $x$  value.

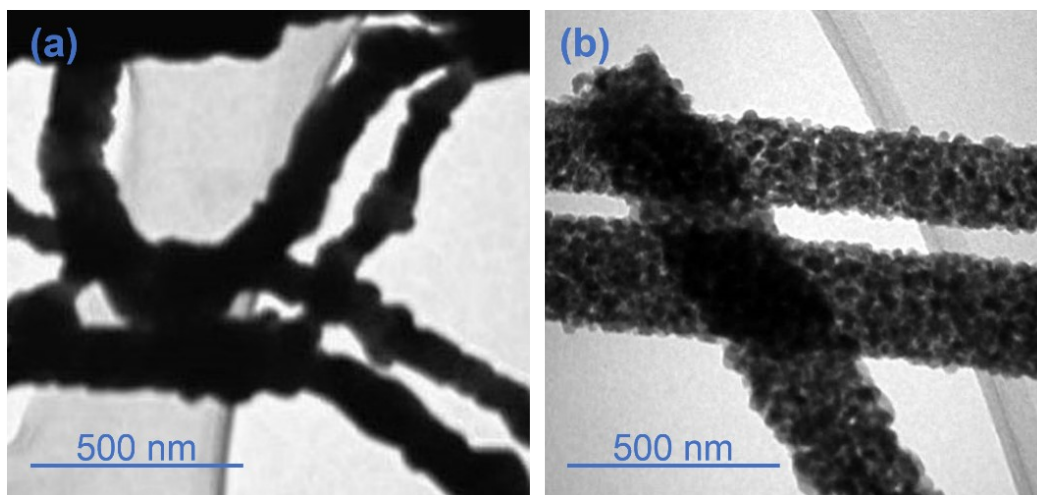

**Figure 3S.** TEM images captured at 500 nm for  $\text{Cu}_x\text{Co}_{1-x}\text{Fe}_2\text{O}_4$  NFs, (a)  $x = 0.2$  and (b)  $x = 0.6$ .

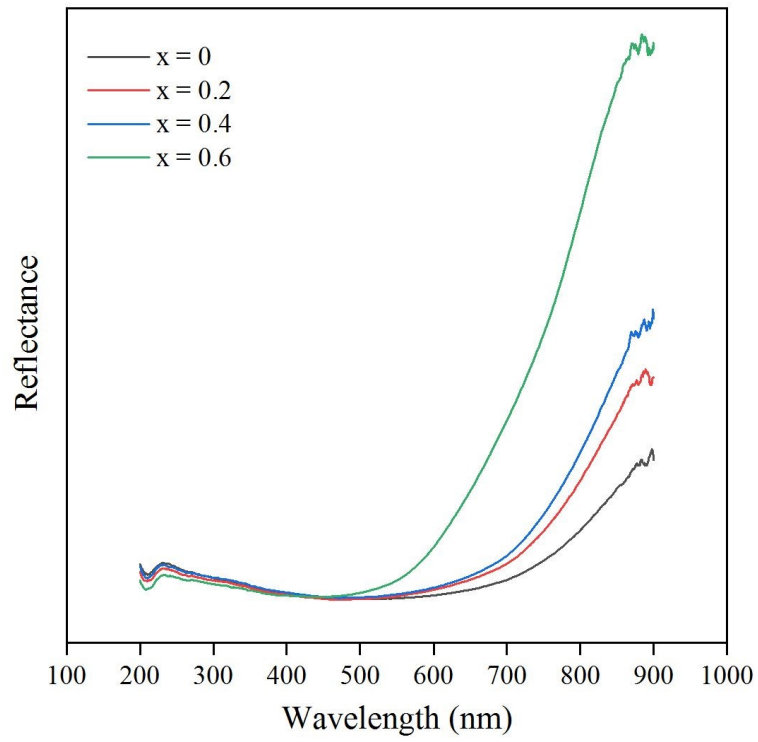

**Figure 4S.** As-measured Uv-Vis diffuse reflectance spectra for  $\text{Cu}_x\text{Co}_{1-x}\text{Fe}_2\text{O}_4$  ( $0 \leq x \leq 0.6$ ) NFs.
